# Supplementary material for: Effect of Danofloxacin Treatment on the Development of Fluoroquinolone Resistance in Campylobacter jejuni in Calves
Source: MDPI journal article supplement (doi:10.3390/antibiotics11040531), 2022-04-15
Supplement: s1 [file s1]

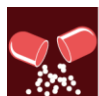*Supplementary Materials*

**Table S1.** Bacterial isolates used for inoculation of calves with *Campylobacter jejuni* (oral) and *Mannheimia haemolytica* (trans-tracheal) in the current study.

| Isolate/strain                   | Source                  | Origin   | Isolation date | Reference  |
|----------------------------------|-------------------------|----------|----------------|------------|
| <i>C. jejuni</i> IA-6-FC-30      | Feces of healthy cattle | Iowa     | 2013           | [67]       |
| <i>C. jejuni</i> MO-2-FC-25      | Feces of healthy cattle | Missouri | 2013           | [67]       |
| <i>M. haemolytica</i><br>VDL4004 | Pneumonic lung of calf  | Iowa     | 2018           | This study |
